# Supplementary material
Source: publisher figshare collection journal article supplement (https://gsapubs.figshare.com/ndownloader/files/23320418)
Supplement: Supplementary file 1 [file 23320418]

Yang, Y., et al., 2020, Is the upward release of intermediate ocean heat content a possible engine for low-latitude processes?: *Geology*, v. 48, <https://doi.org/10.1130/G47271.1>

## **1. STABLE ISOTOPIC AND Mg/Ca ANALYSES**

For Mg/Ca analysis, planktonic foraminiferal shells were cleaned following the standard cleaning protocol developed by Barker et al. (2003). A majority of the crushed planktonic foraminiferal samples then underwent sequential ultrasonic cleaning in alternation with washes in Milli-Q water and methanol, before the removal of organic matter using a 1-2% H<sub>2</sub>O<sub>2</sub> solution, a weak acid leaching using 0.001 M HNO<sub>3</sub> and, finally, being dissolved in 0.075 M HNO<sub>3</sub>. Samples were centrifuged to remove any remaining insoluble particles and then diluted with Milli-Q water and measured using inductively-coupled plasma atomic emission spectroscopy (ICP-AES) at the Key Laboratory of Ocean and Marginal Sea Geology, Chinese Academy of Sciences. The instrumental precision of the ICP-AES was monitored using analysis of an external, in-house standard solution with a Mg/Ca ratio of 4.44 mmol/mol after every three samples. The relative standard deviation of the external standard solution was 0.63%. Analytical reproducibility was estimated using replicate measurements that revealed a standard deviation of 0.42%. The value of the Mn/Ca ratio was ~0.01 mmol/mol, and the value of the Fe/Ca ratio was ~0.15 mmol/mol, indicating that there was no significant contribution of Mg from Mn-Fe-oxide coating.

The remaining crushed planktonic foraminiferal samples set aside for oxygen and carbon isotope analysis also underwent ultrasonic cleaning in alternation with

washes in Milli-Q water and methanol. Oxygen isotope measurements were performed on a Thermo Finnigan MAT 253 mass spectrometer with a Kiel III automatic carbonate preparation device at the Key Laboratory of Ocean and Marginal Sea Geology, South China Sea Institute of Oceanology, Chinese Academy of Sciences. The standard error of the isotope analyses was < 0.05‰. Isotope results were reported relative to the Vienna Pee Belemnite (VPDB) and calibrated using the National Bureau of Standards (NBS) 19 standards.

## 2. UPPER OCEAN HEAT CONTENT (OHC) ESTIMATES

We calculated SCS OHC for the 700-300 m, 300-100 m and  $\leq 100$ m depth intervals using the following equation:

$$\text{OHC} = \rho V C_p \int_h^0 T$$

where OHC is the ocean heat content (in joules),  $\rho$  is the seawater density (1024 kg/m<sup>3</sup>),  $V$  is the area of the SCS ( $6.963 \times 10^{12}$  m<sup>2</sup>) ([http://ngdc.noaa.gov/mgg/global/etopol\\_ocean\\_volumes.html](http://ngdc.noaa.gov/mgg/global/etopol_ocean_volumes.html)),  $C_p$  is the seawater heat content (4,000 joules/°C/kg), and  $T$  is the water temperature at different depths (°C).

## REFERENCE AND CITED

Barker, S., Greaves, M., and Elderfield, H., 2003, A study of cleaning procedures used for foraminiferal Mg/Ca paleothermometry: *Geochemistry, Geophysics, Geosystems*, v. 4, no. 9, p. 20.

Yang, Y. P., Xiang, R., Liu, J. G., and Tang, L. G., 2019, Inconsistent sea surface temperature and salinity changing trend in the northern South China Sea since 7.0 ka BP: Journal of Asian Earth Sciences, v.171, p.178-186.

Table S1. AMS<sup>14</sup>C ages and converted calendar ages for Core S0204B in the northern SCS.

| Sample no. | Depth | Material                                 | Measured<br>AMS <sup>14</sup> C<br>age<br>/a BP | 2 sigma age<br>/a BP | Error | Calendar<br>years<br>/a BP |
|------------|-------|------------------------------------------|-------------------------------------------------|----------------------|-------|----------------------------|
| S0204B22*  | 22    | Mixed foraminifera                       | 480                                             | 395-605              | ±30   | 495                        |
| S0204B37*  | 37    | <i>N.dutertrei</i> + <i>G.sacculifer</i> | 1,690                                           | 1,515-1,800          | ±30   | 1,635                      |
| S0204B52*  | 52    | Mixed foraminifera                       | 2,110                                           | 1,970-2,315          | ±30   | 2,135                      |
| S0204B97*  | 97    | <i>N.dutertrei</i>                       | 3,620                                           | 3,825-4,100          | ±30   | 3,960                      |
| S0204B153* | 153   | <i>N.dutertrei</i>                       | 5,530                                           | 6,205-6,430          | ±30   | 6,300                      |
| S0204B201  | 201   | <i>N.dutertrei</i> + <i>G.sacculifer</i> | 8,080                                           | 8,950-9,235          | ±30   | 9,025                      |
| S0204B221  | 221   | <i>N.dutertrei</i>                       | 8,900                                           | 9,885-10,185         | ±30   | 10,110                     |
| S0204B261  | 261   | <i>N.dutertrei</i> + <i>G.sacculifer</i> | 9730                                            | 10,975-11,215        | ±40   | 11,125                     |
| S0204B301  | 301   | <i>N.dutertrei</i>                       | 11,590                                          | 13,285-13,470        | ±40   | 13,375                     |
| S0204B341  | 341   | <i>N.dutertrei</i>                       | 12,720                                          | 14,895-15,280        | ±40   | 15,130                     |
| S0204B373  | 373   | <i>N.dutertrei</i>                       | 15,720                                          | 19,065-18,780        | ±60   | 18,910                     |
| S0204B413  | 413   | <i>N.dutertrei</i>                       | 17,410                                          | 20,740-21,075        | ±50   | 20,915                     |

\*The AMS<sup>14</sup>C data were previously published by Yang et al. (2019).
